# Supplementary material for: hMYH and hMTH1 cooperate for survival in mismatch repair defective T-cell acute lymphoblastic leukemia
Source: PubMed Central journal article supplement (PMC5177770; doi:10.1038/oncsis.2016.72), 2016-12-05

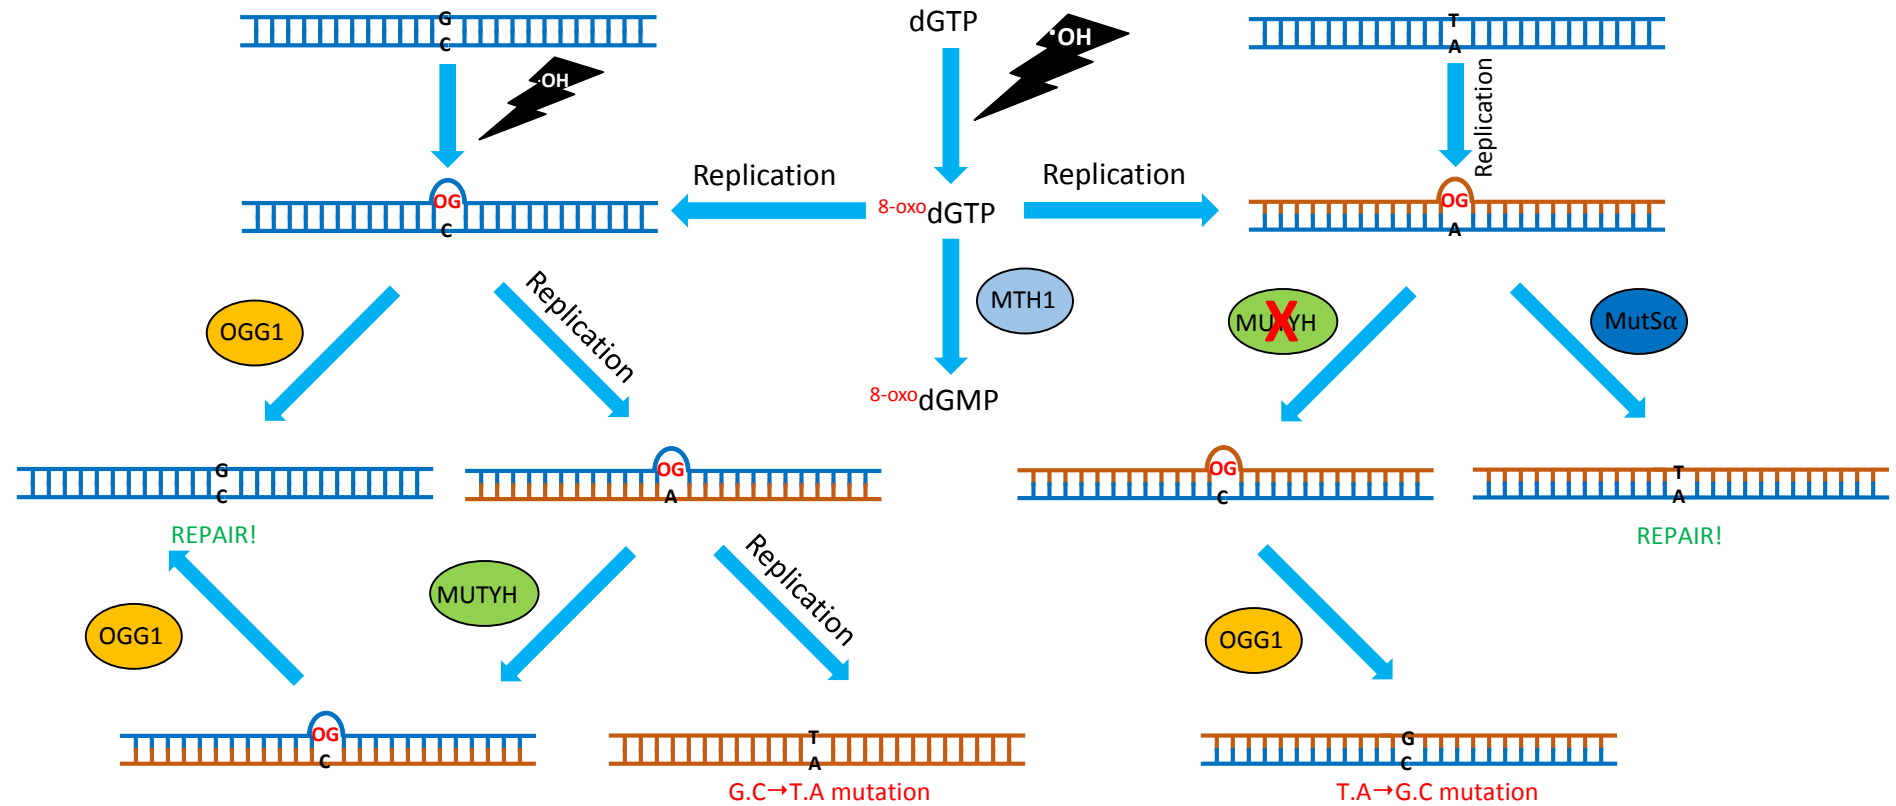

Supplement: oncsis201672x2.pdf [file oncsis201672x2.pdf]
