# Supplementary material for: hMYH and hMTH1 cooperate for survival in mismatch repair defective T-cell acute lymphoblastic leukemia
Source: PubMed Central journal article supplement (PMC5177770; doi:10.1038/oncsis.2016.72), 2016-12-05

**MUTYH - Entrez ID: 4595**

(A)

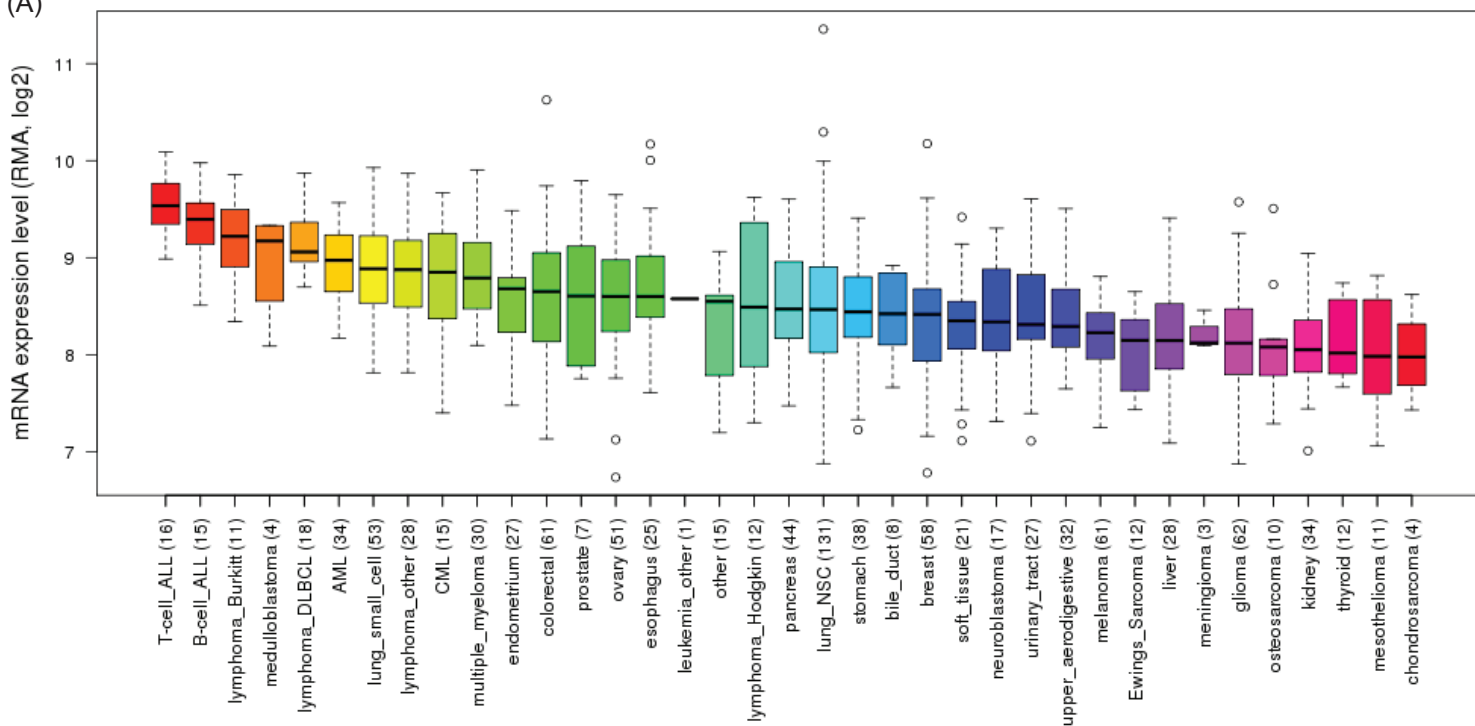

**NUDT1 - Entrez ID: 4521**

(B)

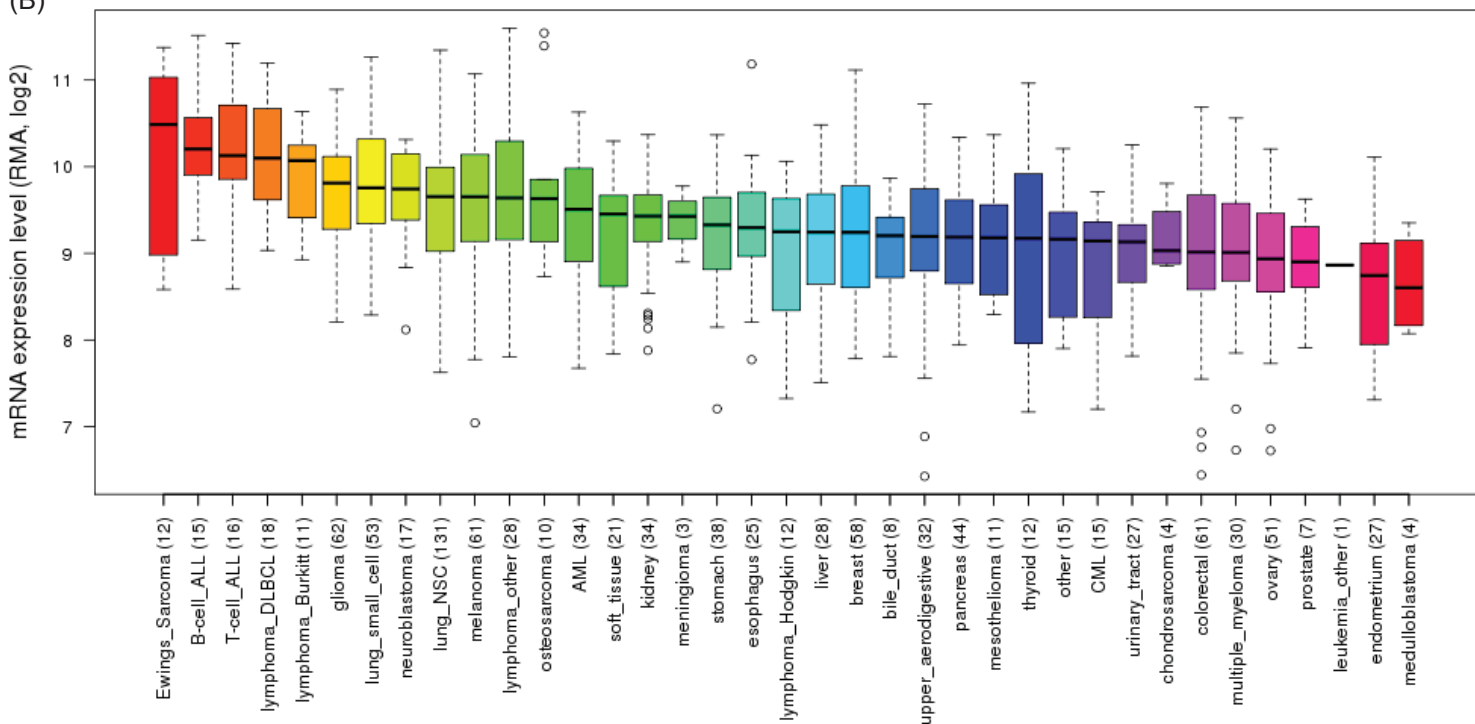

Supplement: oncsis201672x3.pdf [file oncsis201672x3.pdf]
